# Supplementary material for: Crustal Fault Zones (CFZ) as Geothermal Power Systems: A Preliminary 3D THM Model Constrained by a Multidisciplinary Approach
Source: Hindawi journal article supplement (doi:10.1155/2021/8855632), 2021-02-04
Supplement: f1 [file 8855632.f1.docx]

## The supplementary materials contain three tables. They group together the physical and thermal properties of rocks and fluids inserted in the numerical modeling.

## Supplementary Materials

| Variables | Symbols | Basement | Fault Zone | Units |
| --- | --- | --- | --- | --- |
| Young’s modulus | E | 60 | 5 | GPa |
| Poisson’s ratio |  | 0.25 | 0.25 | - |
| Bulk density | ρs | 2600 | 2600 | kg/m3 |
| Permeability | k | variable | variable | m2 |
| Porosity |  | 0.05 | 0.1 | - |
| Biot-Willis coefficient |  | 0.8 | 0.8 | - |
| Thermal conductivity |  | 2.8 | 2.8 | W/(m.K) |
| Heat production | A | 3.5 | 1 | W/m3 |
| Heat capacity |  | 800 | 800 | J/(kg.K) |

Table 1 : Rock properties for parametric study. Properties of these parameters have been recovered in the following works: [Smith and Chapman, 1983; Mckenna and Blackwell, 2004; Rabinowicz et al., 1998; Mareschal et al., 2012; Cappa and Rutqvist, 2011; Coussy, 2004; Hasterok and Webb, 2017; Guillou-Frottier et al., 2013; Duwiquet et al., 2019].

| Variables | Symbols | Gelles granite | Metamorphic unit | Carboniferous plutonic rocks | Migmatitic gneissic complex | Fault Zone | Units |
| --- | --- | --- | --- | --- | --- | --- | --- |
| Young’s modulus | E | 60 | 60 | 60 | 60 | 5 | GPa |
| Poisson’s ratio |  | 0,25 | 0.25 | 0.25 | 0.25 | 0.25 | - |
| Bulk density | ρs | 2600 | 2700 | 2600 | 3000 | 2600 | kg/m3 |
| Permeability | *k* | variable | variable | variable | variable | variable | m2 |
| Porosity |  | 0.05 | 0.05 | 0.05 | 0.05 | 0.1 | - |
| Biot-Willis coefficient |  | 0.8 | 0.8 | 0.8 | 0.8 | 0.8 | - |
| Thermal conductivity |  | 3.25 | 2.5 | 2.8 | 2.5 | 2.8 | W/(m.K) |
| Heat production | A | 4.06 | 2.1 | 3.5 | 2 | 1 | W/m3 |
| Heat capacity |  | 800 | 800 | 800 | 800 | 800 | J/(kg.K) |

Table 2 : Rock properties for Pontgibaud large scale numerical modelling. Properties of these parameters have been recovered in the following works: [Smith and Chapman, 1983; Mckenna and Blackwell, 2004; Rabinowicz et al., 1998; Mareschal et al., 2012; Cappa and Rutqvist, 2011; Coussy, 2004; Hasterok and Webb, 2017; Taillefer et al., 2017, Guillou-Frottier et al., 2013; Duwiquet et al., 2019].

| Variables | Symbols | Values | Units |
| --- | --- | --- | --- |
| bulk density | ρf | variable | Kg/m3 |
| Thermal conductivity |  | 0.6 | W/m.K |
| Heat capacity |  | 4200 | J/(kg.K) |
| Dynamic viscosity |  | variable | Pa.s-1 |
| Compressibility |  |  | Pa-1 |
| Fluid source term |  | 0 | kg/m3/s |

Table 3 : Fluid properties for numerical parametric studies and for Pontgibaud large-scale numerical modelling. Properties of these parameters have been recovered in the following works: [Smith and Chapman, 1983; Mckenna and Blackwell, 2004; Rabinowicz et al., 1998; Mareschal et al., 2012; Cappa and Rutqvist, 2011; Coussy, 2004; Hasterok and Webb, 2017; Taillefer et al., 2017, Guillou-Frottier et al., 2013; Duwiquet et al., 2019].
